# Supplementary material for: Ultra-small nickel phosphide nanoparticles as a high-performance electrocatalyst for the hydrogen evolution reaction
Source: Royal Society of Chemistry journal article supplement (doi:10.1039/c6ra15230a), 2016-01-01
Supplement: c6ra15230a1.pdf [file c6ra15230a1.pdf]

## Supporting Information

### **Ultra-small nickel phosphide nanoparticles as an high-performance electrocatalysis for hydrogen evolution reaction**

Miao Zhou,<sup>†</sup> Yanyan Kang,<sup>†</sup> Keke Huang,<sup>‡</sup> Zhan Shi,<sup>‡</sup> Renguo Xie,<sup>†,\*</sup> and Wensheng Yang<sup>†</sup>

<sup>†</sup> College of Chemistry, Jilin University, Changchun 130012, China

<sup>‡</sup> State Key Laboratory of Inorganic Synthesis and Preparative Chemistry, Jilin University, Changchun 130012, China

E-mail: [renguoxie@jlu.edu.cn](mailto:renguoxie@jlu.edu.cn)

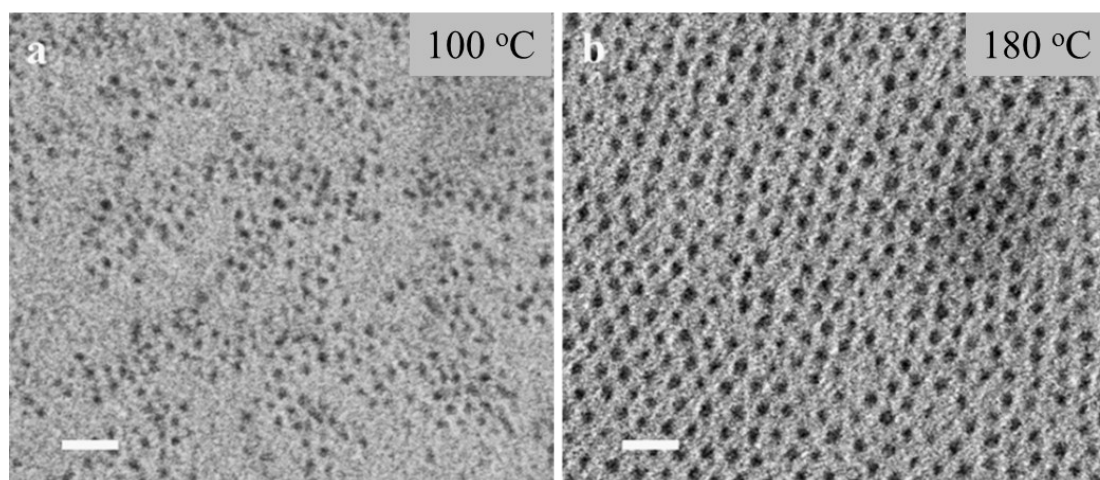

**Figure S1.** Low-magnification TEM images of  $\text{Ni}_2\text{P}$  with different sizes synthesized at different temperatures without OAm: 100 °C (a) and 180 °C (b) The scale bar is 20 nm.

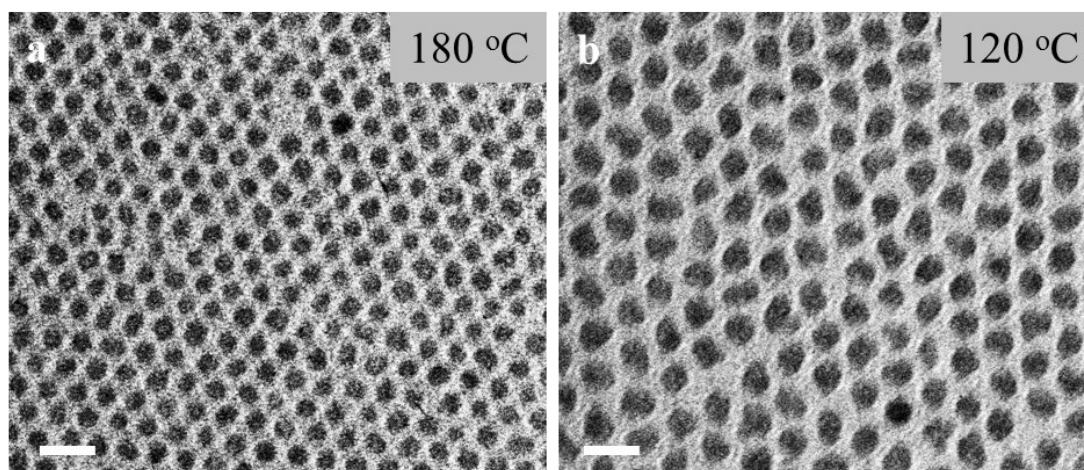

**Figure S2.** Low-magnification TEM images of  $\text{Ni}_2\text{P}$  with different sizes synthesized at different temperatures with 0.5 mL of OAm: (a) 8.1 nm and (b) 11.8 nm. The scale bar is 20 nm.

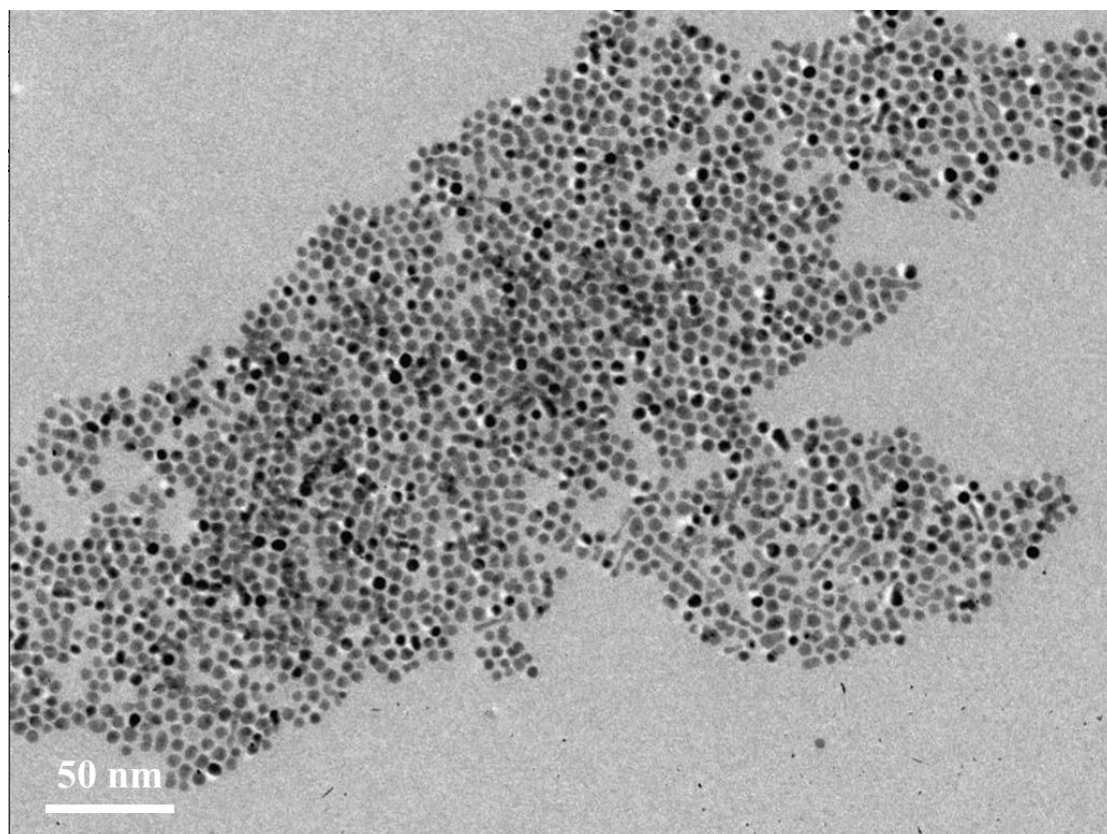

**Figure S3.** Wide area TEM image of 2.8 nm  $\text{Ni}_2\text{P}$  nanoparticles after high temperature annealing.

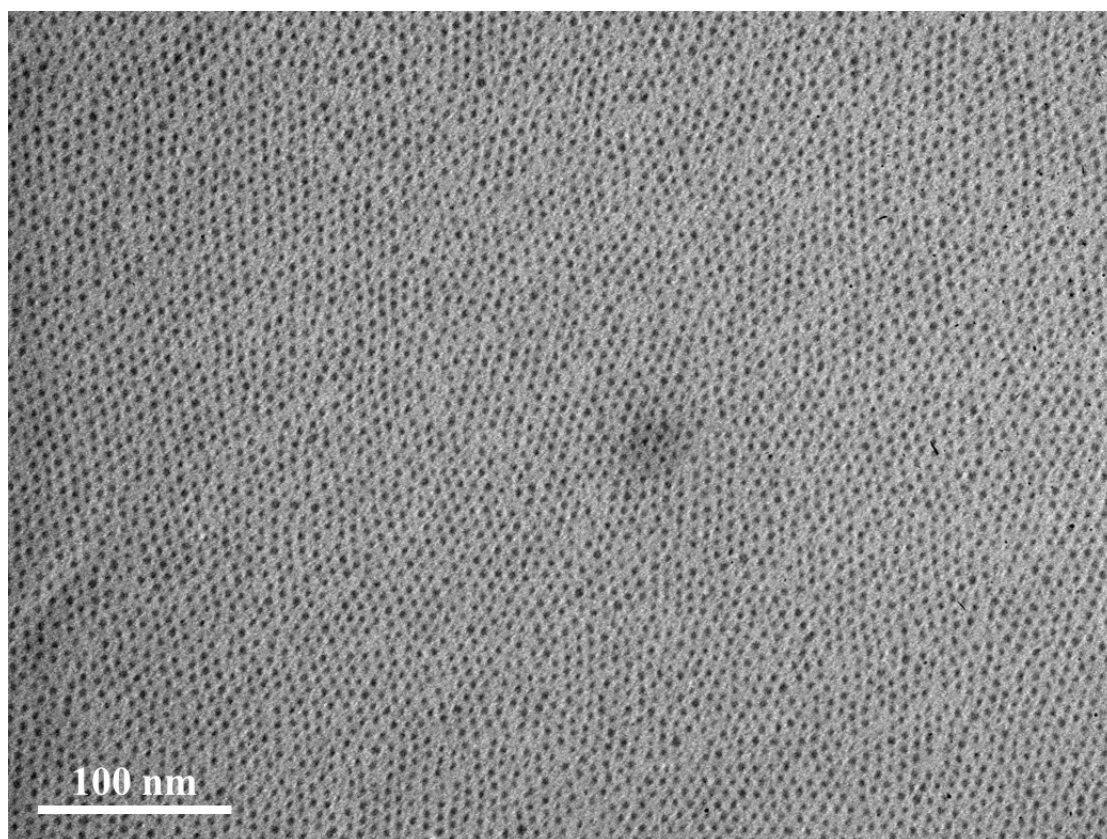

**Figure S4.** Wide area TEM image of 2.8 nm amorphous  $\text{Ni}_2\text{P}$  nanoparticles.

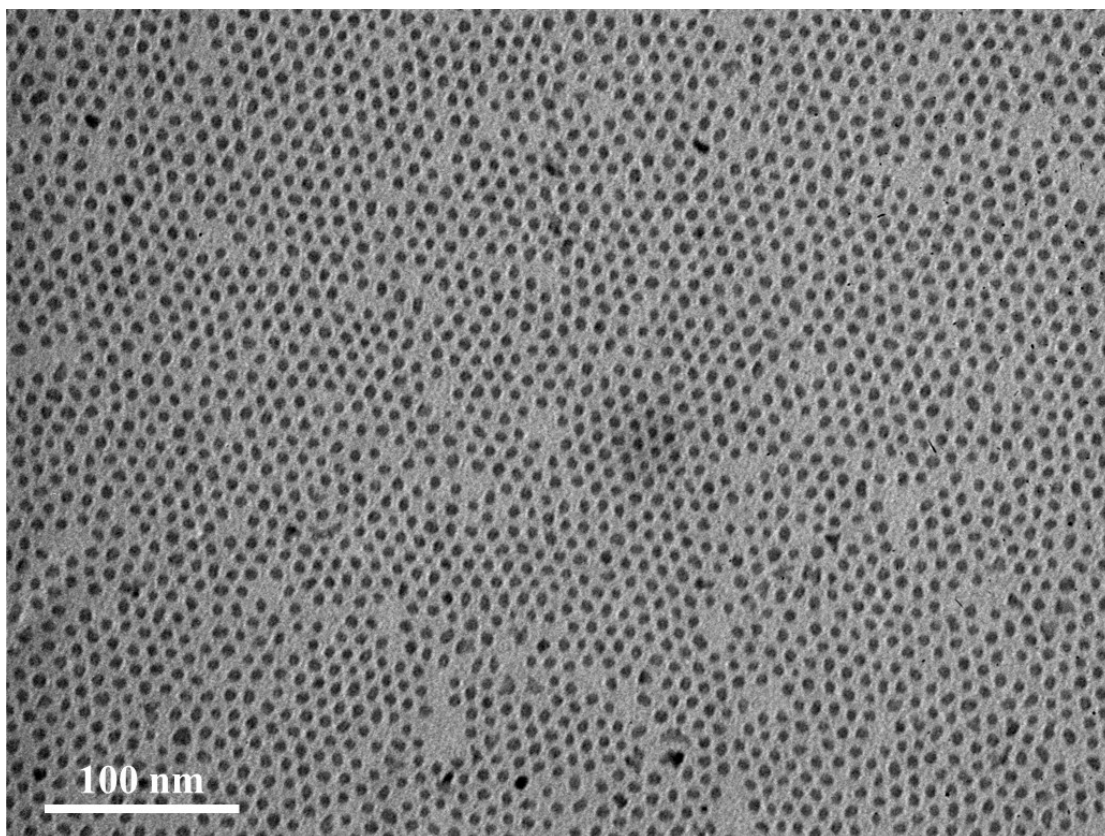

**Figure S5.** Wide area TEM image of 5.4 nm amorphous  $\text{Ni}_2\text{P}$  nanoparticles.

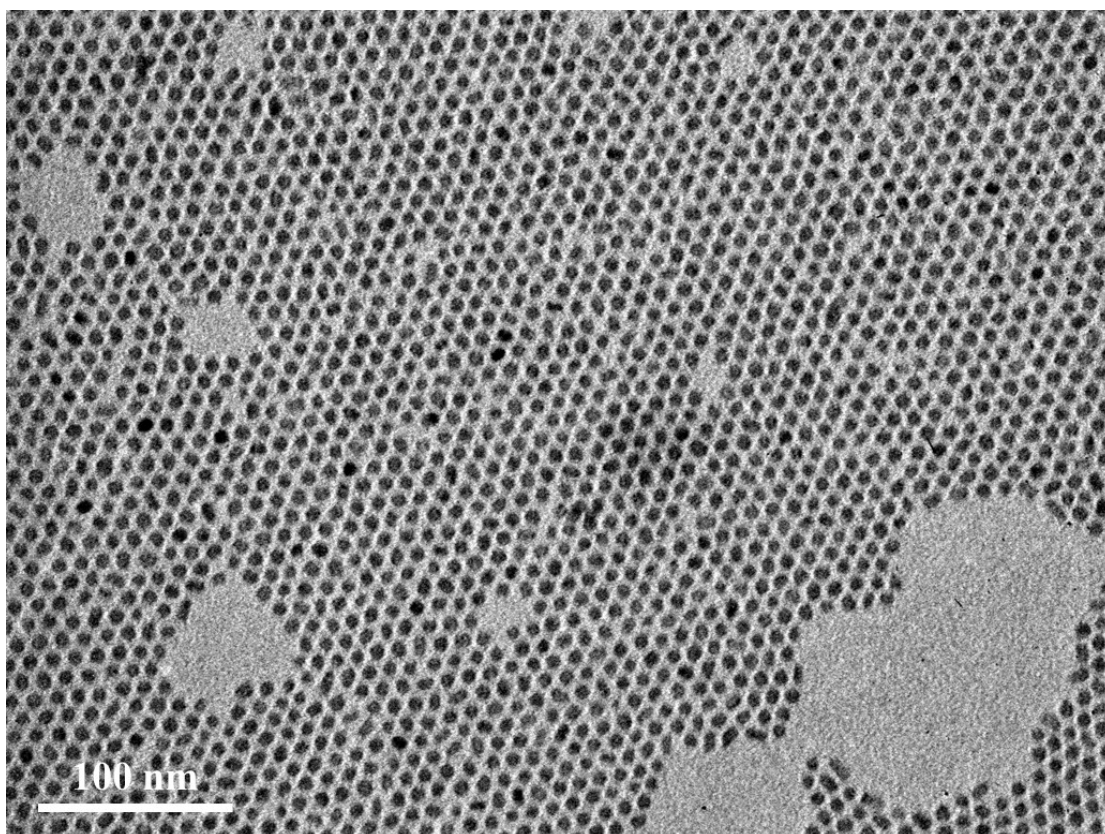

**Figure S6.** Wide area TEM image of 8.1 nm amorphous  $\text{Ni}_2\text{P}$  nanoparticles.

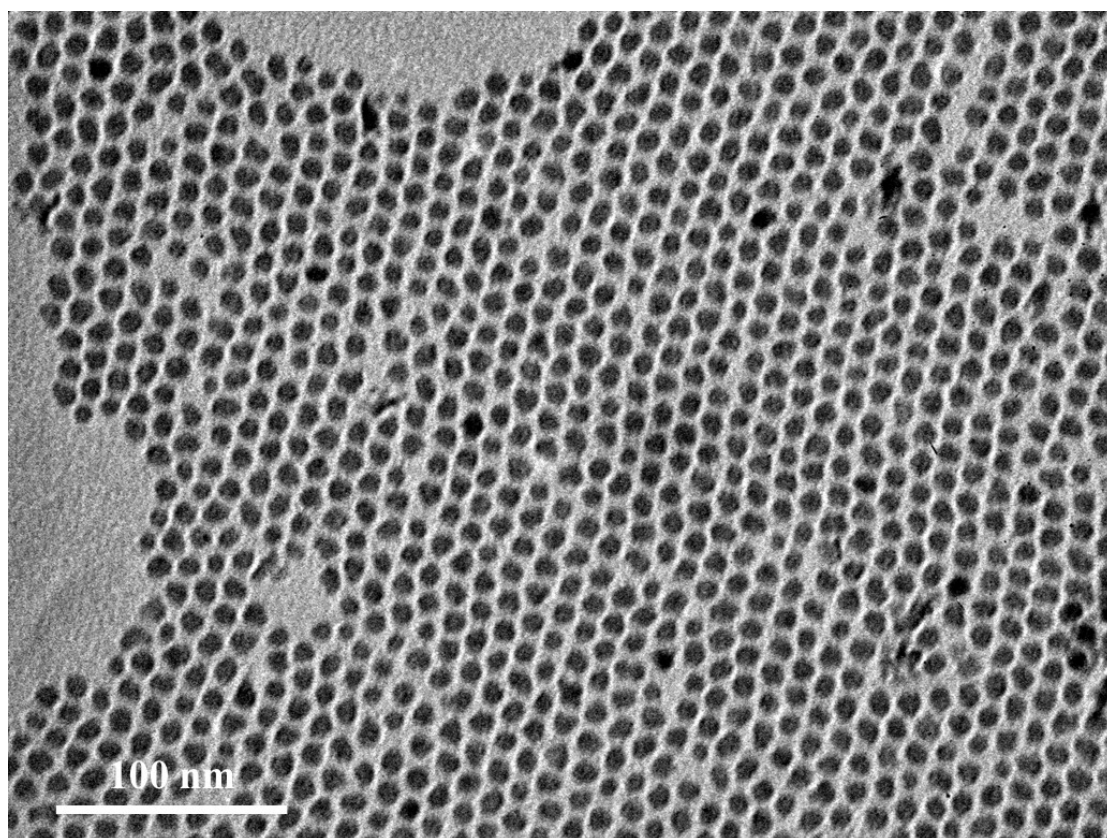

**Figure S7.** Wide area TEM image of 9.5 nm amorphous  $\text{Ni}_2\text{P}$  nanoparticles.

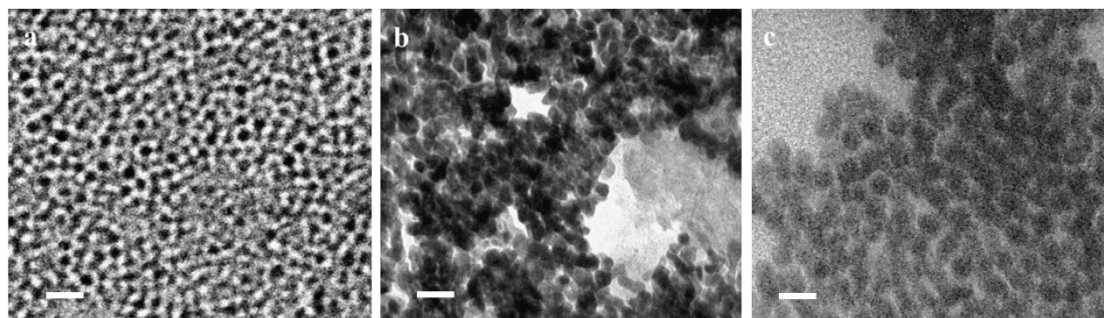

**Figure S8.** Low-magnification TEM images of Ni<sub>2</sub>P with different sizes annealing at 450 °C for 2 hours: (a) 5.4 nm; (b) 8.1 nm; and (c) 9.5 nm. The scale bar is 20 nm.

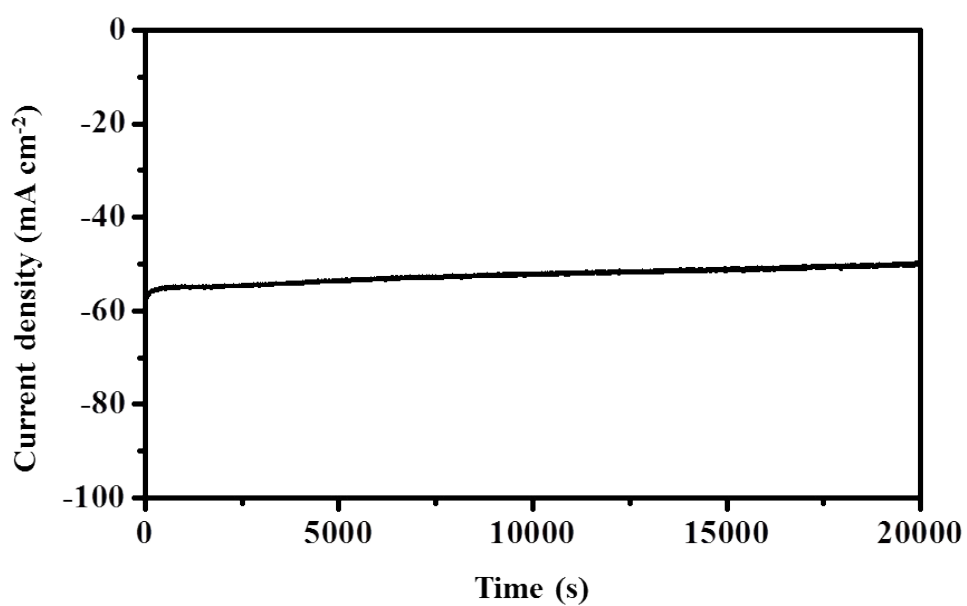

**Figure S9.** Chronoamperometric stability measurements of 8.1 nm Ni<sub>2</sub>P NPs (1.0 mg•cm<sup>-2</sup>) held at -150 mV vs. RHE for 5.6 hours in 0.5 M H<sub>2</sub>SO<sub>4</sub>.

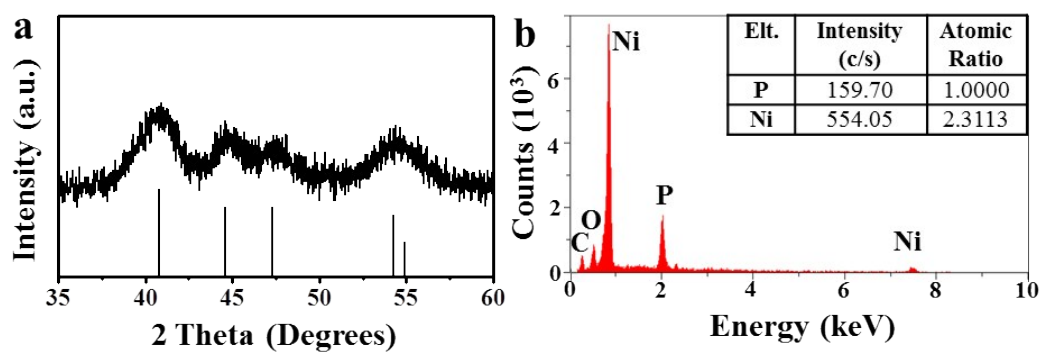

**Figure S10.** (a) XRD patterns and (b) EDS spectrum of 8.1 nm  $\text{Ni}_2\text{P}$  NPs after long-term stability test.

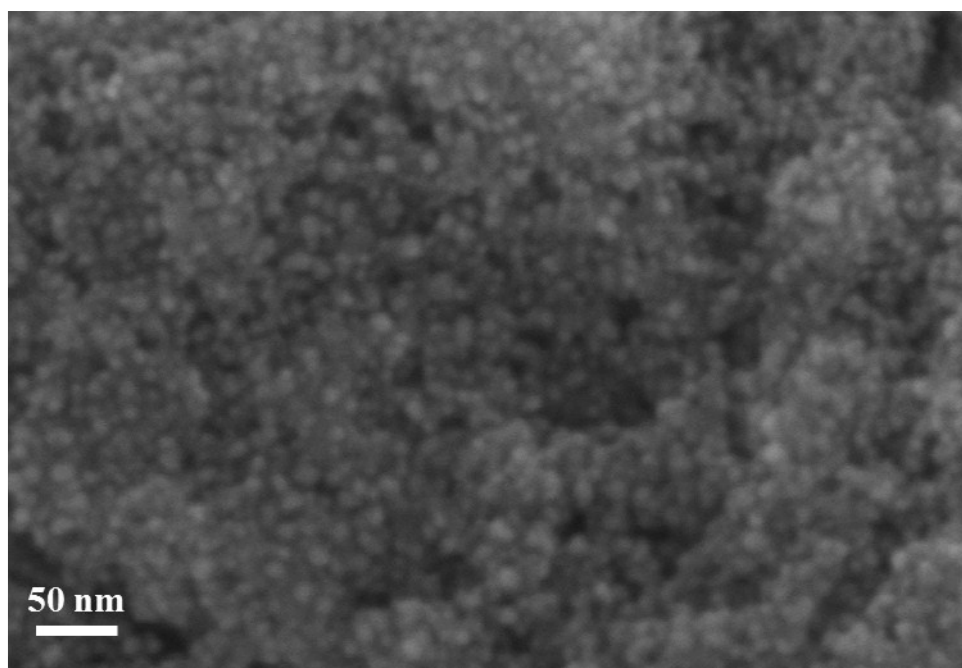

**Figure S11.** SEM image of 8.1 nm Ni<sub>2</sub>P NPs after long-term stability test.

**Table S1.** Comparison of TOFs of Ni<sub>2</sub>P NPs with different sizes from this report.

| Size (nm)                                       | 5.4 nm | 8.1 nm | 9.5 nm |
|-------------------------------------------------|--------|--------|--------|
| Tafel slop (mV/decade)                          | 41.4   | 44.9   | 46.7   |
| Sg (cm <sup>2</sup> /mg)                        | 1511   | 1020   | 960    |
| Current Density at 150 mV (mA/cm <sup>2</sup> ) | 123.1  | 55.2   | 34.0   |
| TOFs (s <sup>-1</sup> atom <sup>-1</sup> )      | 0.10   | 0.07   | 0.04   |
